# Supplementary material
Source: PubMed Central journal article supplement (PMC3262033)
Supplement: supp_184.12.1395_Sterman_ODS.pdf [file supp_184.12.1395_Sterman_ODS.pdf]

**A Trial of Intrapleural Adenoviral-mediated Interferon- $\alpha$ 2b Gene Transfer for  
Malignant Pleural Mesothelioma**

Daniel Stermán, M.D., Daniel H Stermán, Andrew Haas, Edmund Moon, Adriana Recio, Daniel Schwed, Anil Vachani, Sharyn I Katz, Colin T Gillespie, Guanjun Cheng, Jing Sun, Emmanouil Papasavvas, Luis J. Montaner, Daniel F Heitjan, Leslie Litzky, Joseph Friedberg, Melissa Culligan, Carl H June, Richard G Carroll, Steven M Albelda

**ONLINE DATE SUPPLEMENT**

**Methods:**

Anti-adenoviral Nab assessment. Nabs were assessed as previously described (10) and expressed as 1/serum dilution that inhibited 50% of the gene transfer induced by an adenovirus expressing the luciferase gene used to infect A549 lung cancer cells.

Immunoblots. To detect Ad.IFN- $\alpha$ 2b-induced humoral responses against tumor antigens, immunoblotting against purified proteins and extracts from mesothelioma cell lines was performed using pre- and post-gene transfer sera. Purified SV40 large T-antigen protein was purchased from Chimerx (Milwaukee, WI). Purified mesothelin was provided by Drs. M. Ho and I. Pastin (National Cancer Institute). In some cases, cell lines were derived from patient pleural fluid samples and were grown in culture as previously described (9). Extracts from cells or purified proteins were prepared and immunoblotted with patient serum (diluted at 1:1500) from time points before treatment, and 6 weeks to 6 months after treatment as previously described (9).

***Phenotypic characterization of innate immune cells by flow cytometry***

Cryopreserved peripheral blood mononuclear cells (PBMC) collected prior to treatment and two days after gene transfer, were thawed and natural killer cell (NK) subsets and their activation status, were assessed with mAbs against CD3, CD14, CD19, CD20, CD56, CD16, CD69 and IFN $\alpha$ R. All mAbs were from BD Biosciences (San Diego, CA).

Briefly, PBMC samples were thawed, adjusted to  $3 \times 10^6$ /ml in culture media and  $100 \mu\text{l}$  cells ( $3 \times 10^5$  cells) were placed into sterile FACS tubes (one for each stain/condition) and incubated overnight at  $37^\circ\text{C}$ . The next day, cells were incubated for 10 min at RT with 10% human serum and 10% serum corresponding to each of the Abs used, and then stained with CD3 PE-Cy7, CD14 APC-H7, CD19 APC-H7, CD20 APC-H7, CD56 V450, CD16 PerCP-Cy5.5, CD69 FITC, IFN- $\gamma$  PE, or corresponding surface isotype mAb (IgG1k PE-Cy7, IgG1k APC-H7, IgG1k V450, IgG1k PerCP-Cy5.5, IgG1k FITC, IgG1k PE) for 30 min on ice. Cells were then washed with FACS washing buffer (1xPBS supplemented with 0.1% BSA and 0.02%  $\text{NaN}_3$ , supplemented with 10% human serum and 10% serum corresponding to each of the Abs used), incubated with 1mL BD FACS Lysing solution (BD Biosciences) for 10 min at  $37^\circ\text{C}$ , washed with 2ml FACS washing buffer, re-suspended in  $100 \mu\text{l}$  FACS washing buffer and analyzed using LSRII. Analysis was done by collecting 100000 live lymphocytes (defined by size and granularity in FSC and SSC). Dead cells were excluded by manual gating in FSC/SSC. Detection thresholds were set according to isotype-matched negative controls. Results were expressed as Mean Fluorescent Intensity (MFI) and percent (%) of lymphocytes. Data analysis was performed using FloJo software (Tree Star, San Carlos, CA).

## Supplemental Table 1. Adverse Events

The table below summarizes all adverse events as graded using the National Cancer Institute Common Terminology Criteria for Adverse Events v 3.0

| Protocol: IRB 808806 UPCC 18508 IBC 08-292 CTCR 1176 IDS P-390                                     |                          |    |    |    |       |
|----------------------------------------------------------------------------------------------------|--------------------------|----|----|----|-------|
| Adverse Event                                                                                      | GRADE (Number of Events) |    |    |    | Total |
|                                                                                                    | 1                        | 2  | 3* | 4* |       |
| <b>Immunology/Allergy</b>                                                                          |                          |    |    |    |       |
| Recurrent ascites secondary to inflammation from vector                                            | 1                        |    | 1  |    | 2     |
| <b>BLOOD</b>                                                                                       |                          |    |    |    |       |
| Anemia                                                                                             | 3                        | 10 | 1  |    | 14    |
| Leukopenia                                                                                         | 7                        | 6  | 1  |    | 14    |
| Lymphopenia                                                                                        | 4                        | 3  | 7  | 3  | 17    |
| Neutropenia                                                                                        |                          | 1  | 2  |    | 3     |
| Thrombocytopenia                                                                                   | 2                        | 3  |    |    | 5     |
| <b>CARDIAC</b>                                                                                     |                          |    |    |    |       |
| Hypotension-transient                                                                              |                          | 2  |    |    | 2     |
| <b>COAGULATION</b>                                                                                 |                          |    |    |    |       |
| PT                                                                                                 | 2                        |    |    |    | 2     |
| PTT-elevated                                                                                       | 2                        | 1  |    |    | 3     |
| PTT-low                                                                                            | 3                        |    |    |    | 3     |
| <b>CONSTITUTIONAL</b>                                                                              |                          |    |    |    |       |
| Fatigue (* note: all patients with cytokine release syndrome had fatigue as part of that syndrome) |                          |    | 1  |    | 1     |
| Insomnia                                                                                           | 1                        | 1  |    |    | 2     |
| <b>DERMATOLOGY</b>                                                                                 |                          |    |    |    |       |
| Erythema at pleurx site                                                                            | 1                        | 1  |    |    | 2     |
| Erythema - dressing margin                                                                         | 3                        | 1  |    |    | 4     |
| Rash-pleural catheter Site                                                                         | 1                        |    |    |    | 1     |
| Bruising-pleural catheter site                                                                     | 2                        |    |    |    | 2     |
| <b>GI</b>                                                                                          |                          |    |    |    |       |
| Nausea                                                                                             |                          | 2  |    |    | 2     |
| Vomiting                                                                                           | 3                        |    |    |    | 3     |
| Constipation                                                                                       | 2                        | 1  |    |    | 3     |
| Diarrhea                                                                                           | 1                        |    |    |    | 1     |
| Ulceration-stress induced                                                                          | 1                        | 1  |    |    | 2     |
| <b>INFECTION</b>                                                                                   |                          |    |    |    |       |
| Skin-pleural catheter site                                                                         |                          | 1  |    |    | 1     |
| Pleural Catheter Site                                                                              | 1                        |    |    |    | 1     |
| Staph Aureus-Pleural Cath Site                                                                     |                          |    | 1  |    | 1     |
| <b>HEMORRHAGIC</b>                                                                                 |                          |    |    |    |       |
| Melena                                                                                             | 1                        |    |    |    | 1     |
| Epistaxis                                                                                          | 1                        |    |    |    | 1     |
| <b>LYMPHADEMA</b>                                                                                  |                          |    |    |    |       |
| Bipedal                                                                                            | 1                        |    |    |    | 1     |
| <b>METABOLIC</b>                                                                                   |                          |    |    |    |       |
| Hypoalbumenia                                                                                      | 5                        | 11 | 1  |    | 17    |
| Alkaline phosphatase-elevated                                                                      | 1                        |    |    |    | 1     |

|                                    |            |           |           |          |            |
|------------------------------------|------------|-----------|-----------|----------|------------|
| Alkaline phosphatase-low           |            | 1         |           | 1        |            |
| ALT-low                            | 7          |           |           | 7        |            |
| AST-low                            | 1          | 1         |           | 2        |            |
| AST-elevated                       | 1          |           |           | 1        |            |
| Bilirubin, total-low               | 3          |           |           | 3        |            |
| Hypocaclemia                       | 8          | 3         |           | 11       |            |
| Creatinine-low                     | 2          |           |           | 2        |            |
| Creatinine-elevated                | 1          | 2         |           | 3        |            |
| Hyperglycemia                      | 1          | 2         | 3         | 6        |            |
| Hypoglycemia                       |            | 1         |           | 1        |            |
| Protein, Total, low                | 12         |           |           | 12       |            |
| Hyperammonemia                     | 1          |           |           | 1        |            |
| BUN                                | 3          |           |           | 3        |            |
| Chloride                           | 6          |           |           | 6        |            |
| CO2                                | 1          |           |           | 1        |            |
| Hypomagnesemia                     |            | 1         |           | 1        |            |
| Potassium - low                    | 2          |           |           | 2        |            |
| Sodium - low                       | 8          |           |           | 8        |            |
| TSH, high                          | 1          |           |           | 1        |            |
| <b>NEUROLOGY</b>                   |            |           |           |          |            |
| Mood Alteration-anxiety            | 2          |           |           | 2        |            |
| <b>PAIN</b>                        |            |           |           |          |            |
| Headache                           | 1          |           |           | 1        |            |
| Pleural catheter site              | 3          | 3         |           | 6        |            |
| Infusion site                      | 1          | 1         |           | 2        |            |
| Tumor                              |            | 3         |           | 3        |            |
| Penile on urination (no infection) | 1          |           |           | 1        |            |
| PAC site-no infection              |            | 1         |           | 1        |            |
| Back-worsening pre-existent        |            | 1         |           | 1        |            |
| Episodic under Right breast        |            | 1         |           | 1        |            |
| <b>PULMONARY</b>                   |            |           |           |          |            |
| Chest congestion                   |            | 1         |           | 1        |            |
| Cough                              | 1          | 2         |           | 3        |            |
| Hypoxia                            |            | 2         | 1         | 3        |            |
| <b>SYNDROME</b>                    |            |           |           |          |            |
| Cytokine Release                   | 9          | 12        |           | 21       |            |
| <b>TOTAL</b>                       | <b>124</b> | <b>83</b> | <b>18</b> | <b>3</b> | <b>228</b> |
| *Do not meet definition of DLT     |            |           |           |          |            |

Supplemental Table 2. Interferon- $\alpha$  concentrations were measured using an ELISA kit at the designated time points.

Supplemental Table 2A: Pleural Fluid IFN- $\alpha$  Levels (ng/ml)

\* received only one dose, NA = not available

| Patient | Dose                 | Day 1<br>Pre<br>1st<br>dose | Day 2 | Day 3 | Day 4<br>(pre<br>2nd<br>dose) | Day 5 | Day 6 | Day 14 |
|---------|----------------------|-----------------------------|-------|-------|-------------------------------|-------|-------|--------|
|         | Viral Part.          |                             |       |       |                               |       |       |        |
| 301     | 10 <sup>12</sup>     | 0.03                        | 1906  | NA    | 925                           | 715   | NA    | NA     |
| 302*    | 10 <sup>12</sup>     | 0.02                        | 203   | 116   | 44                            | 5     | 2     | NA     |
| 303     | 10 <sup>12</sup>     | 0.66                        | 75    | 144   | 150                           | 72    | 147   | 43.7   |
| 304     | 3 x 10 <sup>11</sup> | 0.01                        | 11    | 5     | 0.98                          | 3     | 0.7   |        |
| 307     | 3 x 10 <sup>11</sup> | 1.07                        | 11    | 4     | 2                             | 2     | 1.6   | 0.7    |
| 308     | 3 x 10 <sup>11</sup> | 0.07                        | 11    | 2     | 2                             | 11    | NA    | NA     |
| 309     | 3 x 10 <sup>11</sup> | 0.02                        | 127   | 54    | 37                            | 21    | NA    | NA     |
| 312     | 3 x 10 <sup>11</sup> | 0                           | 0     | 2.2   | 0.9                           | 1.2   | NA    | NA     |
| 313*    | 3 x 10 <sup>11</sup> | 0                           | 0.9   | 2.1   | 1.1                           | 0.6   | NA    | NA     |

Supplemental Table 2B. Serum IFN $\alpha$  Levels (ng/ml)

\* received only one dose, NA = not available

| Patient | Dose                 | Day 1<br>Pre<br>1st<br>dose | Day 2 | Day 3 | Day 4<br>(pre<br>2nd<br>dose) | Day 5 | Day 8 | Day 14 |
|---------|----------------------|-----------------------------|-------|-------|-------------------------------|-------|-------|--------|
|         | Viral Part.          |                             |       |       |                               |       |       |        |
| 301     | 10 <sup>12</sup>     | 0                           | 4.7   | NA    | 0.5                           | 0.4   | NA    | NA     |
| 302*    | 10 <sup>12</sup>     | 0.04                        | 7.7   | NA    | 1.9                           | NA    | 0.5   | NA     |
| 303     | 10 <sup>12</sup>     | 3.3                         | 3.7   | NA    | 3.7                           | 3.9   | NA    | NA     |
| 304     | 3 x 10 <sup>11</sup> | 0                           | 2.5   | 0.9   | 0.08                          | 0.05  | 0     | 0      |
| 307     | 3 x 10 <sup>11</sup> | 6.3                         | 3.7   | 3.7   | 3.2                           | 2.7   | 3.4   | 3.4    |
| 308     | 3 x 10 <sup>11</sup> | 0.07                        | 0.07  | 0.07  | 0.07                          | 0.07  | 0.07  | NA     |
| 309     | 3 x 10 <sup>11</sup> | 0                           | 0.5   | 0.16  | 0                             | 0     | 0     | 0      |
| 312     | 3 x 10 <sup>11</sup> | 0                           | 0     | 0     | 0                             | 0     | 0     | 0      |
| 313*    | 3 x 10 <sup>11</sup> | 0                           | 1.3   | 0.2   | 0.05                          | 0     | 0     | 0      |

**Supplemental Table 3: Anti-Ad Neutralizing Antibody Titers**

Neutralizing antibody titers were determined as per Materials and Methods. The Nab titer was defined as the dilution of serum which inhibited gene transduction by 50% and is expressed as 1/titer.

|      | Dose               | Day 1<br>(Pre<br>1st<br>dose) | Day 2 | Day 3 | Day 4<br>(pre<br>2nd<br>dose) | Day 5  | Day 8   | Day 14  | Day 29  |
|------|--------------------|-------------------------------|-------|-------|-------------------------------|--------|---------|---------|---------|
|      | Viral Part.        | 1/titer                       |       |       |                               |        |         |         |         |
| 301  | $10^{12}$          | <25                           | <50   | NA    | <50                           | 100    | NA      | NA      | NA      |
| 302* | $10^{12}$          | <25                           | 100   | NA    | 300                           | 400    | 19,200  | 25,600  | >12,800 |
| 303  | $10^{12}$          | 75                            | 75    | NA    | 100                           | 100    | NA      | NA      | 2,400   |
| 304  | $3 \times 10^{11}$ | <25                           | <25   | <25   | <25                           | 200    | >12,800 | >12,800 | >12,800 |
| 307  | $3 \times 10^{11}$ | <50                           | <50   | <50   | <50                           | <50    | 3,200   | 12,800  | >12,800 |
| 308  | $3 \times 10^{11}$ | <25                           | 300   | 150   | 25                            | 50     | 12,800  | NA      | NA      |
| 309  | $3 \times 10^{11}$ | <25                           | <25   | <25   | <25                           | 800    | >25,600 | >25,600 | NA      |
| 312  | $3 \times 10^{11}$ | 1:800                         | 1:800 | 1:800 | 1:800                         | 1:1000 | >25,600 | >25,600 | >25,600 |
| 313* | $3 \times 10^{11}$ | 1:400                         | 1:400 | 1:400 | 1:400                         | 1:400  | >25,600 | >25,600 | >25,600 |

NA= not available

\*Subject received only one dose

Supplemental Figure 1

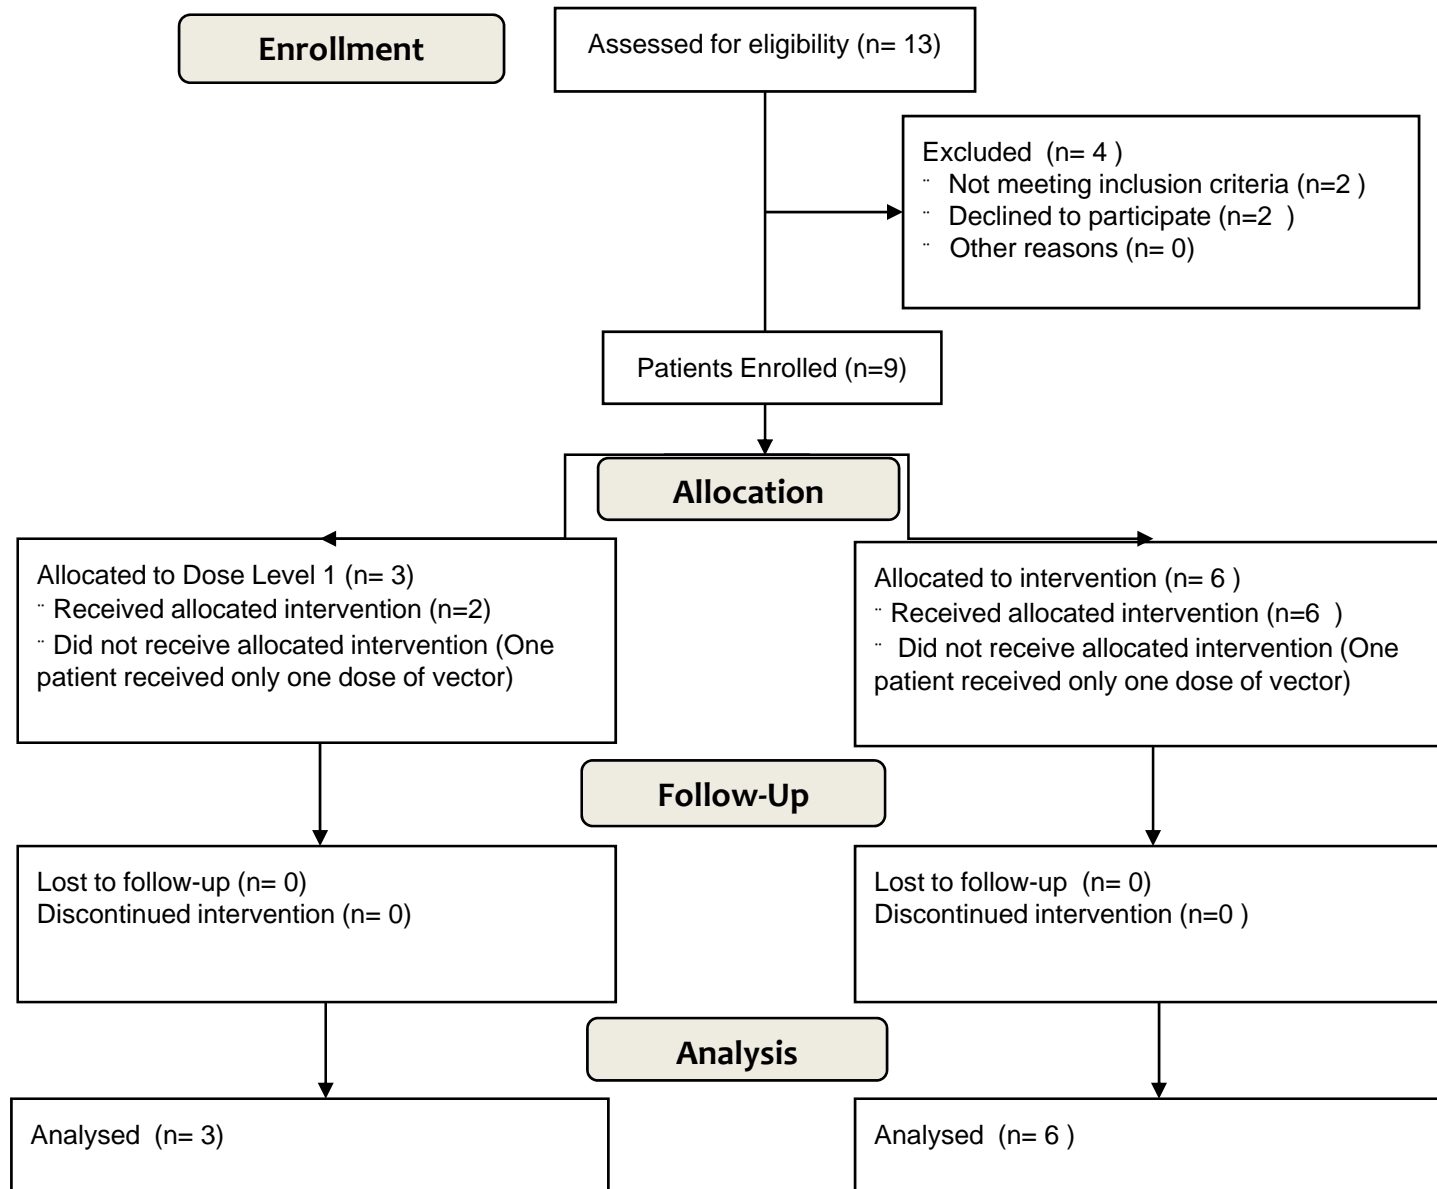



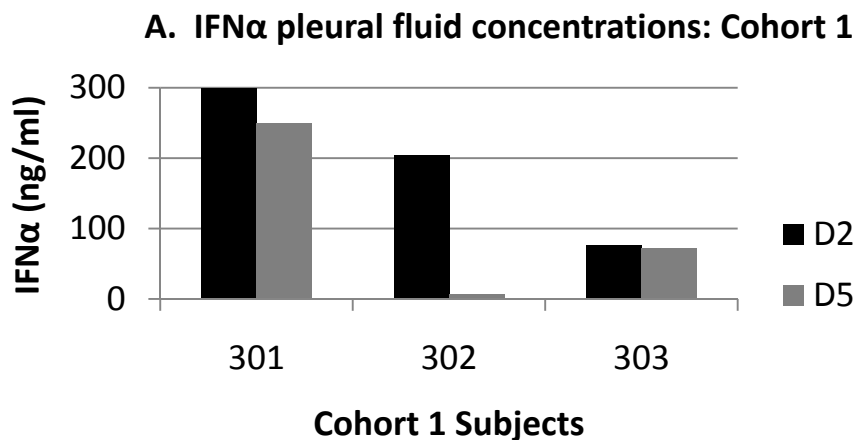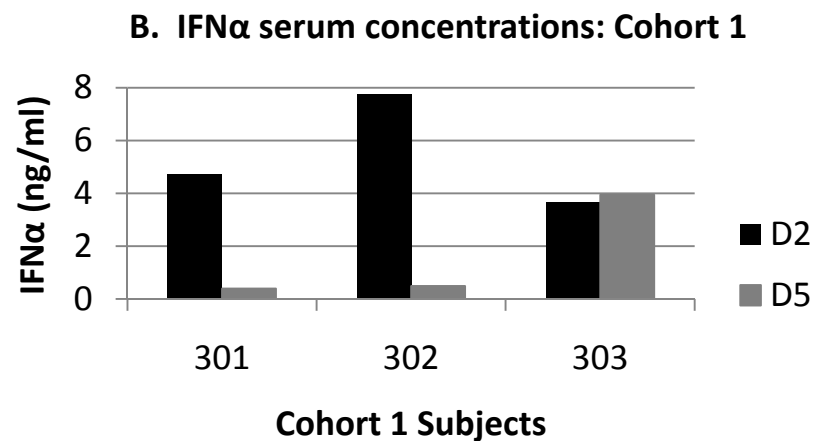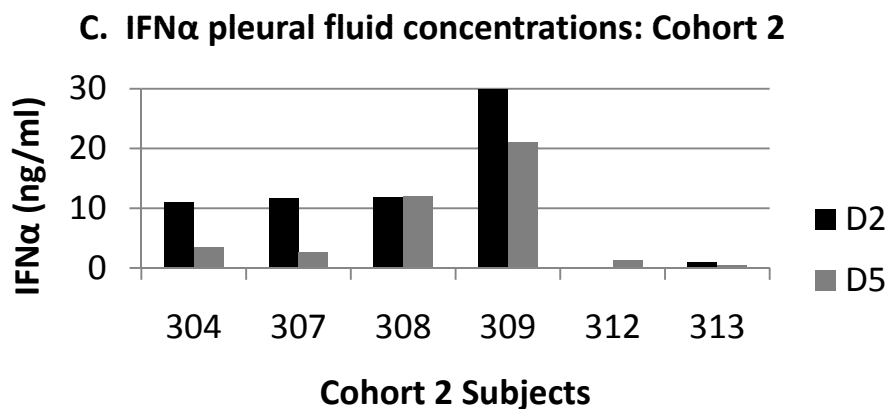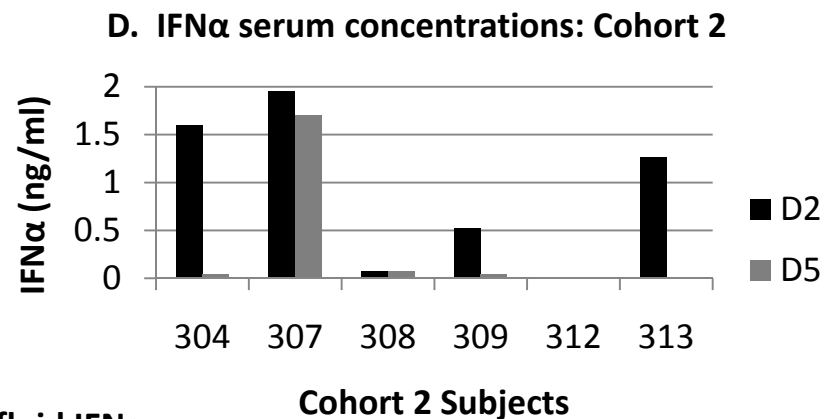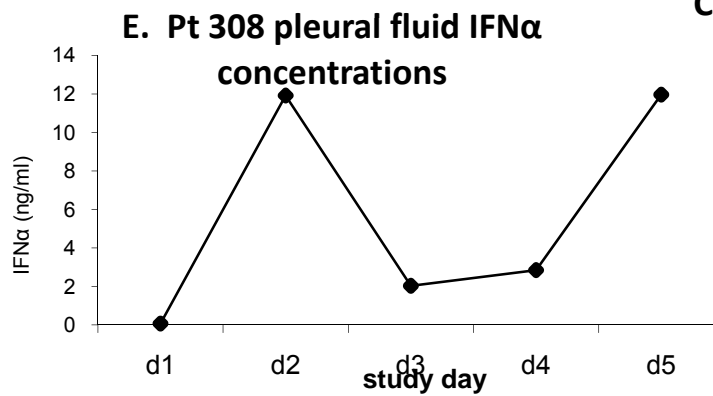

## **Supplemental Figure 2. Pleural and Serum Interferon- $\alpha$ Concentrations**

**Panel A.** Concentrations of IFN- $\alpha$  protein were measured (via ELISA) in pleural fluid from the three patients in Cohort 1 ( $1 \times 10^{12}$  vps) 24 hours after the first Ad.IFN- $\alpha$ 2b dose (Day 2) and 24 hours after the second Ad.IFN- $\alpha$ 2b dose (Day 5). IFN- $\alpha$  concentrations on the Y-axis are expressed as ng/ml.

**Panel B.** Concentrations of IFN- $\alpha$  protein were measured in serum from the three patients in Cohort 1 ( $1 \times 10^{12}$  vps) at the same time points as above. Subject 303 had higher than expected pre-therapy IFN $\alpha$  level in serum (refer to Supplemental Table 2)

**Panel C** Concentrations of IFN- $\alpha$  protein were measured in pleural fluid from the six patients in Cohort 2 ( $3 \times 10^{11}$  vps) at the same time points as above.

**Panel D.** Concentrations of IFN- $\alpha$  protein were measured in serum from the six patients in Cohort 2 ( $3 \times 10^{11}$  vps) at the same time points as above. Subject 307 had higher than expected pre-therapy IFN $\alpha$  level in serum (refer to Supplemental Table 2)

**Panel E.** Time course of pleural fluid IFN-a protein concentrations in the Subject 308. The vector was instilled on Day 1 and Day 4, after the pleural fluid samples had been taken. Note the increase on Day 5 after the second dose of vector on Day 4.
